# Supplementary material for: Omega-6 Polyunsaturated Fatty Acids Enhance Tumor Aggressiveness in Experimental Lung Cancer Model: Important Role of Oxylipins
Source: MDPI journal article supplement (doi:10.3390/ijms23116179), 2022-05-31
Supplement: s1 [file s1]

**Supplementary Table S1.** w-6 oxylipins levels in plasma of mice with balanced and w-6 rich diet. M±SEM, \*p<0.05, \*\*p<0.01, \*\*\*p<0.001

| ω-6 PUFAs | Enzyme | Oxylipins                | Balanced diet<br>(μmol/L) | ω-6 rich diet<br>(μmol/L) | <i>P value</i><br>(t-test)* |
|-----------|--------|--------------------------|---------------------------|---------------------------|-----------------------------|
| LA        | COX    | ---                      | ---                       | ---                       | ---                         |
|           | LOX    | 9-HODE                   | 2654.3±174.1              | 10285±612.4               | ***                         |
|           |        | 13-HODE                  | 2097.4±112.5              | 8985.5±473.2              | ***                         |
|           |        | 9,10,13-TriHOME          | 112.9±38.5                | 152.3±15.9                | ns                          |
|           |        | 9,12,13-TriHOME          | 192.9±63.2                | 276.9±33.7                | ns                          |
|           | CYP450 | 9,10-EpOME               | 829.5±229.9               | 1150.9±341.1              | ns                          |
|           |        | 12,13-EpOME              | 654.8±195.3               | 995.2±311.0               | ns                          |
|           |        | 9,10-DiHOME              | 11.3±3.5                  | 13.5±3.0                  | ns                          |
|           |        | 12,13-DiHOME             | 13.1±3.4                  | 21.0±11.1                 | ns                          |
| ARA       | COX    | TXB <sub>2</sub>         | 11.0±3.5                  | 28.2±9.4                  | *                           |
|           |        | PGD <sub>2</sub>         | 0.2±0.06                  | 0.5±0.1                   | *                           |
|           |        | PGF <sub>2a</sub>        | 1.0±0.2                   | 2.1±0.7                   | ns                          |
|           |        | PGE <sub>2</sub>         | 0.3±0.04                  | 0.6±0.2                   | ns                          |
|           | LOX    | LXA <sub>4</sub>         | 3.0±1.2                   | 7.9±2.5                   | *                           |
|           |        | LTB <sub>4</sub>         | 0.7±0.3                   | 1.5±0.6                   | ns                          |
|           |        | 6-trans-LTB <sub>4</sub> | 0.3±0.09                  | 0.5±0.4                   | ns                          |
|           |        | 5-oxo-ETE                | 20.9±4.7                  | 56.7±5.1                  | ns                          |
|           |        | 12-oxo-ETE               | 142.5±60.4                | 534.6±177.1               | *                           |
|           |        | 15-oxo-ETE               | 7.9±1.9                   | 17.1±5.7                  | ns                          |
|           |        | 5-HETE                   | 22.2±8.8                  | 29.7±8.7                  | ns                          |
|           |        | 8-HETE                   | 11.6±3.5                  | 24.9±7.2                  | ns                          |
|           |        | 9-HETE                   | 0.01±0.001                | 1.2±0.4                   | ***                         |
|           |        | 11-HETE                  | 17.8±6.4                  | 38.0±14.6                 | ns                          |
|           |        | 12-HETE                  | 325.1±201.1               | 1751.8±400.1              | **                          |
|           |        | 15-HETE                  | 22.9±7.9                  | 48.9±17.7                 | ns                          |
|           | CYP450 | 20-HETE                  | 0.2±0.04                  | 0.3±0.06                  | ns                          |
|           |        | 5,6-EpETrE               | 932.2±207.2               | 1431.2±418.8              | ns                          |
|           |        | 8,9-EpETrE               | 412.2±144.1               | 583.6±156.7               | ns                          |
|           |        | 11,12-EpETrE             | 197.1±43.1                | 271.7±75.3                | ns                          |
|           |        | 14,15-EpETrE             | 130.9±27.6                | 183.4±52.0                | ns                          |
|           |        | 5,6-DiHETrE              | 0.6±0.1                   | 1.2±0.1                   | **                          |
|           |        | 8,9-DiHETrE              | 0.7±0.2                   | 1.6±0.1                   | *                           |
|           |        | 11,12-DiHETrE            | 0.4±0.1                   | 0.8±0.1                   | ns                          |
|           |        | 14,15-DiHETrE            | 0.8±0.2                   | 1.5±0.2                   | *                           |

**Supplementary Table S2.** w-3 oxylipins levels in plasma of mice with balanced and w-6 rich diet. M±SEM, \*p<0.05, \*\*p<0.01, \*\*\*p<0.001

| ω-3 PUFAs | Enzyme | Oxylipins        | Balanced diet<br>(μmol/L) | ω-6 rich diet<br>(μmol/L) | <i>p value</i> |
|-----------|--------|------------------|---------------------------|---------------------------|----------------|
| ALA       | COX    | ---              | ---                       | ---                       | ---            |
|           | LOX    | 9-HOTrE          | 7.4±2.5                   | 6.3±1.0                   | ns             |
|           |        | 13-HOTrE         | 7.6±1.6                   | 0.2±0.03                  | **             |
|           | CYP450 | 9,10-EpODE       | 55.9±22.0                 | 18.0±4.5                  | ns             |
|           |        | 12,13-EpODE      | 45.7±18.1                 | 14.8±3.8                  | ns             |
|           |        | 15,16-EpODE      | 112.5±46.9                | 43.1±10.1                 | ns             |
|           |        | 9,10-DiHODE      | 0.3±0.1                   | 0.2±0.1                   | ns             |
|           |        | 12,13-DiHODE     | 2352.3±718.6              | 1686.7±239.4              | ns             |
|           |        | 15,16-DiHODE     | 2.0±0.2                   | 2.4±0.2                   | ns             |
|           |        |                  |                           |                           |                |
| EPA       | COX    | PGD <sub>3</sub> | 0.3±0.1                   | 0.08±0.02                 | *              |
|           | LOX    | 5-HEPE           | 42.3±19.5                 | 4.1±1.4                   | *              |
|           |        | 8-HEPE           | 33.4±12.4                 | 1.5±0.7                   | *              |
|           |        | 12-HEPE          | 373.5±204.1               | 103.5±14.5                | ns             |
|           |        | 15-HEPE          | 73.4±33.2                 | 10.0±2.7                  | *              |
|           | CYP450 | 8,9-EpETE        | 131.7±34.4                | 5.2±1.7                   | **             |
|           |        | 11,12-EpETE      | 106.7±27.1                | 6.0±1.2                   | **             |
|           |        | 14,15-EpETE      | 184.4±44.0                | 10.2±1.7                  | **             |
|           |        | 17,18-EpETE      | 226.2±55.8                | 14.4±3.0                  | ***            |
|           |        | 8,9-DiHETE       | 1.0±0.1                   | 0.9±0.4                   | ns             |
|           |        | 11,12-DiHETE     | 0.6±0.05                  | 0.09±0.02                 | ***            |
|           |        | 14,15-DiHETE     | 0.8±0.1                   | 0.1±0.02                  | **             |
|           |        | 17,18-DiHETE     | 3.9±0.7                   | 1.4±0.2                   | **             |
| DHA       | COX    | ---              | ---                       | ---                       | ---            |
|           | LOX    | 17-HDoHE         | 786.3±412.2               | 240.9±39.8                | ns             |
|           | CYP450 | 7,8-EpDPE        | 5353.7±1520.7             | 1207.2±319.2              | *              |
|           |        | 10,11-EpDPE      | 398.5±117.1               | 91.0±22.6                 | *              |
|           |        | 13,14-EpDPE      | 256.5±74.3                | 58.2±14.5                 | *              |
|           |        | 16,17-EpDPE      | 253.3±79.4                | 54.4±13.7                 | *              |
|           |        | 19,20-EpDPE      | 325.1±102.2               | 61.0±17.2                 | *              |
|           |        | 4,5-DiHDPE       | 6.1±3.7                   | 1.4±0.2                   | ns             |
|           |        | 7,8-DiHDPE       | 4550.1±771.2              | 463.9±165.8               | **             |
|           |        | 10,11-DiHDPE     | 1.2±0.2                   | 0.4±0.1                   | *              |
|           |        | 13,14-DiHDPE     | 1.0±0.2                   | 0.4±0.02                  | *              |
|           |        | 16,17-DiHDPE     | 2.0±0.4                   | 0.7±0.09                  | *              |
|           |        | 19,20-DiHDPE     | 17.7±7.1                  | 4.9±0.4                   | *              |
